# Supplementary material
Source: Elsevier journal article supplement (https://www.sciencedirect.com/science/article/pii/S2173578620301554)
Supplement: mmc1 [file S2173578620301554:mmc1.pdf]

## Appendix. Survey's questions

The survey was divided into five sections. Items identified with the symbol \* were mandatory.

### Section 1. General Information

1. Country\*
2. City\*
3. Centre of Training\*
4. Age\*
5. Gender (M/F/Prefer not to say)\*
6. Year of Residency (1,2,3,4,5,6)\*
7. Previous fellowship (research or clinical) abroad (Y/N)\*
8. Are you actively involved in clinical/basic research in Urology (Y/N/N, but I would like to be involved)\*
9. Do you routinely use Social Media (i.e. Twitter) for academic purposes (Y/N)\*
10. In this period of emergency due to the COVID-19 pandemic, in light of the reduced clinical activity, how many HOURS per day could you dedicate to smart learning? (0-1, 2, 3, 3+)\*
11. Is your Centre or Residency School currently providing smart learning sessions for Urology Residents? (Y/N)\*
  12. If Yes, which smart learning modality (interactive webinars, pre-recorded videos, podcasts, social media)
  13. If Yes, which smart learning content (frontal lessons, surgical videos, updates on guidelines, clinical cases, journal clubs, etc.)
14. Do you consider smart learning useful for Urology Residents (regardless of the time of emergency)?(Y/N/Maybe)\*
15. Which other online resources do you follow for smart learning?

### Section 2. MODALITIES of smart learning during the COVID-19 era

16. Do you consider VIDEOS ON-DEMAND (pre-recorded sessions) a useful MODALITY of smart learning during the COVID-19 era? (1 = absolutely not; 5 = absolutely yes) (1,2,3,4,5)\*
17. Do you consider WEBINARS (interactive sessions) a useful MODALITY of smart learning during the COVID-19 era? (1 = absolutely not; 5 = absolutely yes) (1,2,3,4,5)\*
18. Do you consider PODCASTS (pre-recorded audio tracks) a useful MODALITY of smart learning during the COVID-19 era? (1 = absolutely not; 5 = absolutely yes) (1,2,3,4,5)\*

19. Do you consider SOCIAL MEDIA (i.e. Twitter or Facebook) a useful MODALITY of smart learning during the COVID-19 era? (1 = absolutely not; 5 = absolutely yes) (1,2,3,4,5)\*

20. Additional comments

### **Section 3. CONTENTS of smart learning during the COVID-19 era**

21. Do you consider FRONTAL LESSONS useful CONTENTS for smart learning during the COVID-19 \* era? (1 = absolutely not; 5 = absolutely yes) (1,2,3,4,5)\*

22. Do you consider CLINICAL CASE DISCUSSIONS useful CONTENTS for smart learning during the \* COVID-19 era? (1 = absolutely not; 5 = absolutely yes) (1,2,3,4,5)\*

23. Do you consider SURGICAL VIDEOS useful CONTENTS for smart learning during the COVID-19 era? (1 = absolutely not; 5 = absolutely yes) (1,2,3,4,5)\*

24. Do you consider UPDATES ON GUIDELINES useful CONTENTS for smart learning during the COVID-19 era? (1 = absolutely not; 5 = absolutely yes) (1,2,3,4,5)\*

25. Do you consider UPDATES ON ONGOING CLINICAL TRIALS (i.e. RCTs) useful CONTENTS for smart learning during the COVID-19 era? (1 = absolutely not; 5 = absolutely yes) (1,2,3,4,5)\*

26. Do you consider SEMINARS ON LEADERSHIP IN SURGERY useful CONTENTS for smart learning during the COVID-19 era? (1 = absolutely not; 5 = absolutely yes) (1,2,3,4,5)\*

27. Do you consider JOURNAL CLUBS useful CONTENTS for smart learning during the COVID-19 era? (1 = absolutely not; 5 = absolutely yes) (1,2,3,4,5)\*

28. Additional Comments

### **Section 4. NON-TECHNICAL SKILLS**

*Non-technical skills represent a set of abilities and skills that aim to decrease the human error in urology and surgery (communication, teamwork, leadership, decision-making, situation awareness, etc.*

29. Do you consider SEMINARS on NON-TECHNICAL SKILLS useful CONTENTS for smart learning during the COVID-19 era? (1 = absolutely not; 5 = absolutely yes) (1,2,3,4,5)\*

### **Section 5. THE “BEST” SMART LEARNING**

30. Which of the following combinations do you consider MOST USEFUL for smart learning Urology during the COVID-19 era? (multiple answers allowed)\*

Pre-recorded videos - Frontal Lessons

Pre-recorded videos - Clinical case discussions

Pre-recorded videos - Surgical videos

Pre-recorded videos - Updates on Guidelines

Pre-recorded videos - Journal Clubs

Pre-recorded videos - Seminars on non-technical skills

Webinars - Frontal Lessons

Webinars- Clinical case discussions

Webinars - Surgical videos

Webinars - Updates on Guidelines

Webinars - Journal Clubs

Webinars - Seminars on non-technical skills

Podcasts - Frontal Lessons

Podcasts- Clinical case discussions

Podcasts - Updates on Guidelines

Podcasts - Journal Clubs

Podcasts - Seminars on non-technical skills

Social Media - Frontal Lessons

Social Media - Clinical case discussions

Social Media - Surgical videos

Social Media - Updates on Guidelines

Social Media - Journal Clubs

Social Media - Seminars on non-technical skills
